# Supplementary material for: Sentinel lymph node status and oncological outcomes of high-risk and low-risk cutaneous primary melanoma
Source: Research Square preprint supplement (doi:10.21203/rs.3.rs-8321644/v1), 2025-12-22
Supplement: Supplementary file 1 [file c4353d5f8bc8ccaddc4263ae.docx]

**Table 1.** Baseline characteristics of low-risk melanoma (Group A: T1, T2 and T3a) and high-risk melanoma (Group B: T3b, T4a and T4b). ASA, American Society of Anesthesiologists; SD, standard deviation; SLNB, sentinel lymph node biopsy.

| Characteristic | Group A (n=211) | Group B (n=89) | p-value |
| --- | --- | --- | --- |
| **Age**  **Years (median ± SD)** | **61 ± 14.7** | **67 ± 16.0** | **0.003** |
| **Gender**  **– Female**  **– Male** | **108 (51.2%)**  **103 (48.8%)** | **38 (42.7%)**  **51 (57.3%)** | **0.179** |
| **ASA**  **– One**  **– Two**  **– Three**  **– Unknown** | **57 (27.0%)**  **136 (64.5%)**  **13 (6.2%)**  **5 (2.4%)** | **24 (27.0%)**  **49 (55.1%)**  **15 (16.9%)**  **1 (1.1%)** | **0.029** |
| **Ulceration**  **– Absent**  **– Present**  **– Unknown** | **175 (82.9%)**  **23 (10.9%)**  **13 (6.2%)** | **20 (22.5%)**  **67 (75.3%)**  **2 (2.2%)** | **<0.001** |
| **Mitoses**  **median ± SD** | **1 ± 3.2** | **5 ± 5.4** | **<0.001** |
| **SLNB**  **– Negative**  **– Positive**  **– Unknown** | **170 (80.6%)**  **38 (18.0%)**  **3 (1.4%)** | **59 (66.3%)**  **28 (31.5%)**  **2 (2.2%)** | **0.029** |
| **Adjuvant treatment**  **– Administered**  **– Not administered** | **34 (16.1%)**  **177 (83.9%)** | **44 (49.4%)**  **45 (50.6%)** | **<0.001** |
| **Location of melanoma**  **– Head & neck**  **– Trunk**  **– Extremities** | **26 (12.3%)**  **72 (34.1%)**  **113 (53.5%)** | **18 (20.2%)**  **34 (38.2%)**  **37 (41.6%)** | **0.093** |

**Table 2.** Clinical stage prognostic information. Clinical stage refers to staging depending on clinical information without SLNB according to AJCC. Post SLNB stage refers to staging depending on clinical information with SLNB result according to AJCC. SLNB, sen

| **T stage** | | | **Clinical stage** | | | **Post SLNB stage** | | |
| --- | --- | --- | --- | --- | --- | --- | --- | --- |
| ***Stage*** | ***n*** | ***%*** | ***Stage*** | ***n*** | ***%*** | ***Stage*** | ***n*** | ***%*** |
| T3b | 36 | 40.45% | IIB | 58 | 65.17% | IIB | 37 | 41.57% |
| T4a | 22 | 24.72% | IIC | 24 | 26.97% |
| T4b | 31 | 34.83% | IIC | 31 | 34.83% | IIIC | 28 | 31.46% |

**Table 3.** The sentinel lymph node positivity, mean MIA score, adjuvant treatment, recurrence and disease-free survival percentage of patients in the high-risk melanoma group (T3b, T4a and T4b). MIA, Melanoma Institute Australia; SLNB, sentinel lymph node

|  | **T3b (n=36)** | **T4a (n=22)** | **T4b (n=31)** |
| --- | --- | --- | --- |
| **Mean MIA prediction** | 24.0% (6%-58%) | 27.1% (1%-51%) | 35.4% (18%-71%) |
| **Actual SLNB positivity** | 13 (36.1%) | 8 (36.4%) | 7 (22.5%) |
| **Adjuvant treatment** | 14 (38.8%) | 17 (77.2%) | 13 (41.9%) |
| **Recurrence recorded** | 10 (27.8%) | 6 (27.2%) | 12 (38.7%) |
| **Alive without disease recurrence** | 24 (66.7%) | 10 (45.5%) | 19 (61.3%) |
